# Supplementary material for: Is Fairyland for Everyone? Mapping online discourse on gender debates in Hungary
Source: publisher site journal article supplement (doi:10.1515/commun-2024-0007), 2024-11-19
Supplement: Supplementary file 1 [file Szabo_appendix.docx]

**Appendix**

*Table A1: Overview of media outlets and Facebook comment sections.*

| Reference | Date published | Media outlet | Link to article | Link to Facebook post | Comments retrieved |
| --- | --- | --- | --- | --- | --- |
| index_1 | 21.9.2020 | Index | https://index.hu/belfold/2020/09/23/meleg_transznemu_es_leszbikus_hosok_az_uj_mesekonyvben/ | https://www.facebook.com/Indexhu/posts/3847054485327828 | 67 |
| hirado_2 | 22.9.2020 | Híradó | https://hirado.hu/belfold/kozelet/cikk/2020/09/22/atirt-mesek-megjelent-az-elso-magyar-lmbtq-mesekonyv | https://www.facebook.com/hirado.hu/posts/3700794216619629 | 100 |
| 24_1 | 26.9.2020 | 24.hu | https://24.hu/kultura/2020/09/26/meseorszag-mindenkie-mesekonyv-gyerekkonyv-labrisz-ejha-konyv/ | https://www.facebook.com/24ponthu/posts/3681959675188270 | 149 |
| blikk_1 | 01.10.2020 | Blikk | https://www.blikk.hu/aktualis/belfold/duro-dora-ledaralt-mesekonyv-iroja-megszolalt-konykiadok-egyesulete/48mrfq5 | https://www.facebook.com/blikkhu/posts/4853757534649449 | 15 |
| hvg_1 | 01.10.2020 | HVG | https://hvg.hu/360/20201001_Nagy_Boldizsar_a_HVG_Teraszon | https://www.facebook.com/hvghu/posts/10159835096093532 | 220 |
| index_2 | 01.10.2020 | Index | https://index.hu/belfold/2020/10/01/torolte_a_youtube_duro_dora_konyvdaralos_videojat/ | https://www.facebook.com/Indexhu/posts/3875032439196699 | 487 |
| magyarkurir_1 | 02.10.2020 | Magyar Kurír | https://www.magyarkurir.hu/nezopont/pecsi-rita-jo-es-rossz-meseben-avagy-megtalalni-rendet-zurzavarban | https://www.facebook.com/magyarkurir/posts/3572102842841067 | 19 |
| index_5 | 03.10.2020 | Index | https://index.hu/kultur/2020/10/03/isten_hozott_nalam_ocsem_ez_a_valo_vilag/ | https://www.facebook.com/Indexhu/posts/3880431655323444 | 440 |
| hetek_3 | 04.10.2020 | Hetek | https://www.hetek.hu/cikkek/online/van-egy-voros-vonal-hagyjak-beken-a-gyerekeinket-orban  -a | https://www.facebook.com/hetek/posts/4054852387874574 | 52 |
| hirtv_1 | 04.10.2020 | Hír TV | https://hirtv.hu/ahirtvhirei/ujabb-tuntetes-a-meseorszag-mindenkie-cimu-konyv-miatt-2509353 | https://www.facebook.com/hirtv/posts/3688691127816090 | 306 |
| 24_2 | 06.10.2020 | 24.hu | https://24.hu/belfold/2020/10/06/orban-viktor-turelmes-homoszexualisok/ | https://www.facebook.com/24ponthu/posts/3714023875315183 | 29 |
| 444_1 | 06.10.2020 | 444 | https://444.hu/2020/10/06/orbannak-ellenseg-kellett-eppen-egy-mesekonyv-akadt-a-keze-ugyebe | https://www.facebook.com/444.hu/posts/3643500762378322 | 117 |
| merce_1 | 06.10.2020 | Mérce | https://merce.hu/2020/10/06/ket-perc-gyulolet-miert-szallt-be-orban-a-buzizasba/ | https://www.facebook.com/magyarinfo/posts/10158545743053467 | 252 |
| merce_2 | 06.10.2020 | Mérce | https://merce.hu/2020/10/06/ket-perc-gyulolet-miert-szallt-be-orban-a-buzizasba/ | https://www.facebook.com/magyarinfo/posts/10158546766328467 | 60 |
| ujszo_1 | 06.10.2020 | Új Szó | http://ujszo.com/velemeny/duro-dora-daraloja | https://www.facebook.com/ujszo/posts/10159704766575752 | 32 |
| hvg_2 | 07 .10. 2020 | HVG | https://hvg.hu/360/20201007_Kovary_Zoltan_Heves_erdeklodes | https://www.facebook.com/hvghu/posts/10159848679473532 | 145 |
| index_4 | 07.10.2020 | Index | https://index.hu/kulfold/2020/10/07/magyar-lengyel_ket_jo_barat/ | https://www.facebook.com/Indexhu/posts/3891885490844727 | 84 |
| origo_1 | 07.10.2020 | Origo | https://www.origo.hu/itthon/20201007-obudan-mar-azovodakban-erzekenyit-egy-lmbtq-szervezet.html | https://www.facebook.com/OrigoHirek/posts/3577424508975115 | 11 |
| 24_3 | 08.10.2020 | 24.hu | https://24.hu/kultura/2020/10/08/gulyas-gergely-meseorszag-mindenkie-kiskoru-veszelyeztetese/ | https://www.facebook.com/24ponthu/posts/3720762171308020 | 155 |
| azonnali_1 | 09.10.2020 | Azonnali | https://azonnali.hu/cikk/20201009_lekerult-a-libri-es-a-bookline-kinalatabol-a-duro-dora-altal-ledaralt-mesekonyv | https://www.facebook.com/azonnali/posts/1000394950438720 | 36 |
| hetek_1 | 09.10.2020 | Hetek | https://www.hetek.hu/cikkek/online/lehet-e-velemenynyilvanitas-egy-konyv-megsemmisitese | https://www.facebook.com/hetek/posts/4071999586159854 | 35 |
| 24_4 | 11.10.2020 | 24.hu | https://24.hu/kultura/2020/10/11/demeter-szilard-mesorszag-mindenkie-duro-dora/ | https://www.facebook.com/24ponthu/posts/3731046956946208 | 14 |
| magyarhirlap_1 | 12.10.2020 | Magyar Hírlap | https://www.magyarhirlap.hu/velemeny/20201012-melegpropaganda | https://www.facebook.com/magyarhirlap/posts/3539976086047998 | 10 |
| mandiner_1 | 15.10.2020 | Mandiner | https://mandiner.hu/cikk/20201015_duro_dora_nem_vagyok_haragtarto_igy_uj_lehetoseget_kap_a_fidesz_es_a_kdnp_is | https://www.facebook.com/mandiner.hu/posts/10158929745771941 | 58 |
| mandiner_2 | 16.10.2020 | Mandiner | https://mandiner.hu/cikk/20201016_meseorszag_mindenkie_mandiner_podcast | https://www.facebook.com/mandiner.hu/posts/10158931789586941 | 20 |
| velvet_1 | 21.10.2020 | Velvet | https://velvet.hu/gumicukor/2020/10/21/lakatos_mark_kozossegi_media_cyla_szemelyes_es_tarsadalmilag_fontos_temak/ | https://www.facebook.com/velvethu/posts/4592335030838398 | 3 |
| azonnali_2 | 23.10.2020 | Azonnali | https://azonnali.hu/cikk/20201023_szoft-buzizassal-zarta-oktober-23-ai-beszedet-a-kdnp-nogradi-elnoke | https://www.facebook.com/azonnali/posts/1011667005978181 | 21 |
| penzcentrum_1 | 26.10.2020 | Pénzcentrum | https://www.penzcentrum.hu/vasarlas/20201026/14-gyerekkonyv-karacsonyra-ami-elfogadasra-toleranciara-tanitja-a-gyereket-1104748 | https://www.facebook.com/penzcentrum/posts/10158847189308762 | 1 |
| origo_2 | 30.10.2020 | Origo | https://www.origo.hu/itthon/20201030-gender-cimlap-erzekenyites.html | https://www.facebook.com/OrigoHirek/posts/3643914942326071 | 5 |
| demokrata_1 | 02.11.2020 | Demokrata | https://demokrata.hu/magyarorszag/a-gyerek-tabu-306105/ | https://www.facebook.com/demokrata.hetilap/posts/3762515060465382 | 57 |
| index_3 | 03.11.2020 | Index | https://index.hu/belfold/2020/11/03/ha_nincs_vedelem_a_homoszexualis_propagandaval_szemben_meggondolando_hogy_erdemes-e_gyereket_vallalni/ | https://www.facebook.com/Indexhu/posts/3971807736185835 | 468 |
| hvg_3 | 06 11.2020 | HVG | https://hvg.hu/elet/20201106_Betiltotta_a_Meseorszag_mindenkie_cimu_mesekonyvet_egy_fideszes_kepviselotestulet | https://www.facebook.com/hvghu/posts/10159918704473532 | 312 |
| 24_5 | 07.11.2020 | 24.hu | https://24.hu/kultura/2020/11/07/meseorszag-mindenkie-hullamzo-szinvonalu-mozgalmi-ropirat/ | https://www.facebook.com/24ponthu/posts/3808090889241814 | 3 |
| hetek_2 | 09.11.2020 | Hetek | https://www.hetek.hu/cikkek/online/megdobbento-transznemu-eskuvot-tartottak-magyarorszagon-video | https://www.facebook.com/hetek/posts/4163172077042604 | 60 |
| g7_1 | 27.11.2020 | G7 | https://g7.hu/elet/20201127/az-egesz-vilag-mindenkie-egy-mesekonyv-amit-mindenki-kalapacsnak-nezett/ | https://www.facebook.com/g7gazdasag/posts/1566567073541362 | 5 |
| 444_2 | 30.11.2020 | 444 | https://444.hu/2020/11/30/barcsak-olvashattam-volna-ezt-a-konyvet-gyerekkoromban-irta-ian-mckellen-a-meseorszag-mindenkierol | https://www.facebook.com/444.hu/posts/3804376522957411 | 291 |
| szeretlekm_1 | 16.12.2020 | Szeretlek Magyarország | https://www.szeretlekmagyarorszag.hu/hirek/most-mar-egyaltalan-nem-tudjuk-elkepzelni-hogy-valaha-gyerekunk-lesz-magyarorszagon/ | https://www.facebook.com/IMagyarorszag/posts/10158007761481194 | 886 |
| nlc_1 | 21.12.2020 | NLC | https://nlc.hu/szabadido/20201221/james-corden-the-prom-meleg-szerepek/ | https://www.facebook.com/www.nlc.hu/posts/10158173191748773 | 10 |
